# Supplementary material for: Hepatoma cell-intrinsic TLR9 activation induces immune escape through PD-L1 upregulation in hepatocellular carcinoma
Source: PubMed Central journal article supplement (PMC7255037; doi:10.7150/thno.44417), 2020-05-17
Supplement: thnov10p6530s1.pdf [file thnov10p6530s1.pdf]

## Supplementary Information

The contents in this section include four supplementary figures.

### Supplementary Figure. 1

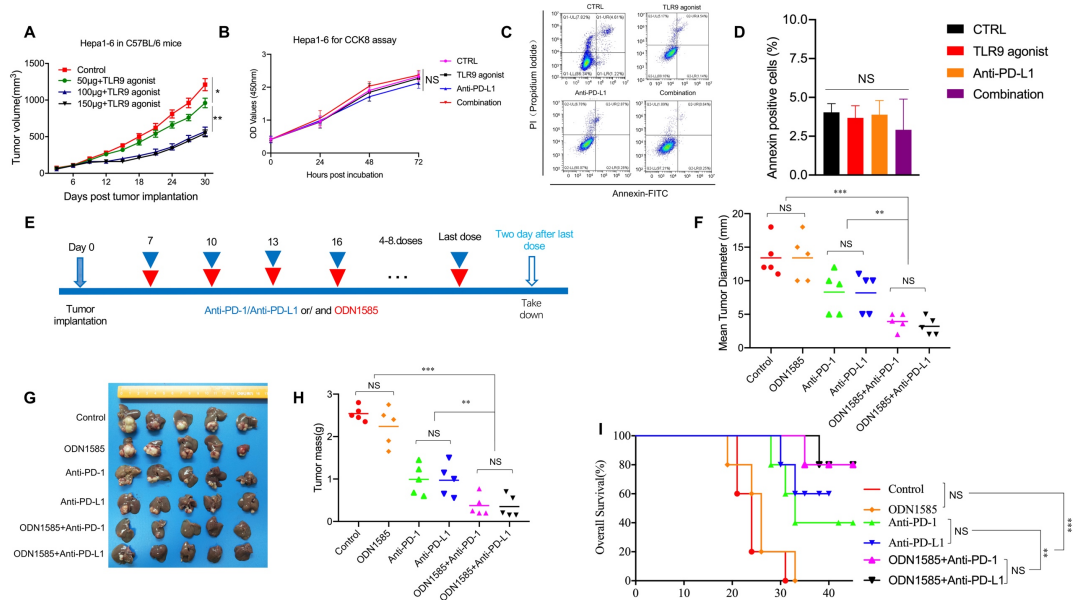

(A) Growth of subcutaneous Hepa1-6 tumors in ODN1585 combine with anti-PD-1 antibody or control-treated C57BL/6 mice. Tumors were measured at the indicated time points. ( $n=5$  per group, values are mean  $\pm$  SD, \* $p < 0.05$ , \*\* $p < 0.01$ ). (B) Untreated Hepa1-6 cells or cells treated with ODN1585 (murine TLR9 agonist, 5µM) or anti-PD-L1 (0.5µg/µl) or combination for 48 h were subjected to a Cell Counting Kit-8 assay. The viable cells were measured after 24, 48, and 72 h. (values are mean  $\pm$  SD, NS indicates no significance). (C and D) Flow cytometry analysis of apoptotic cells under after treatment with TLR9 agonist or anti-PD-L1. (values are mean  $\pm$  SD, NS indicates no significance). (E) Schematic diagram of the drug intervention protocol utilizing the TLR9 agonist ODN1585 and/or anti-PD-1 antibody or anti-PD-L1 antibody to treat C57BL/6 mice. (F) Mean tumor diameter of orthotopic Hepa1-6 tumors in ODN1585 and/or anti-PD-1 antibody or anti-PD-L1 antibody treated C57BL/6 mice. ( $n=5$  per group, \*\* $p < 0.01$ , \*\*\* $p < 0.001$ , NS indicates no significance). (G) Representative images of Hepa1-6 orthotopic HCC tumors from each group. (H) Tumor weights at the drug intervention endpoints. ( $n=5$  per group, \*\* $p < 0.01$ , \*\*\* $p < 0.001$ , NS indicates no significance). (I) Survival of mice bearing Hepa1-6 tumors following treatment with ODN1585 and/or anti-PD-1 antibody or anti-PD-L1 antibody. ( $n=5$  per group, \*\* $p < 0.01$ , \*\*\* $p < 0.001$ , NS indicates no significance).

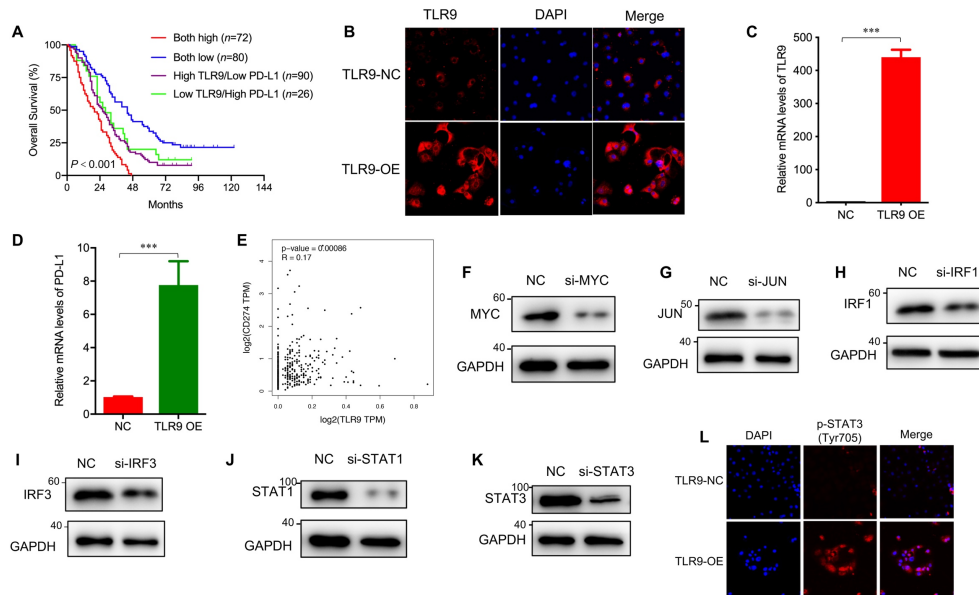

## Supplementary Figure. 2

(A) The overall survival of difference groups according to the expression pattern of TLR9 and PD-L1 were analyzed with Kaplan-Meier survival analysis. (B) TLR9 expression after exogenous TLR9 overexpression in Huh7 cells. The TLR9 expression levels were analyzed by immunofluorescence. (C) mRNA levels of TLR9 measured by qRT-PCR after exogenous TLR9 overexpression in Huh7 cells. (values are mean  $\pm$  SD, \*\*\* $p < 0.001$ ). (D) mRNA levels of PD-L1 measured by qRT-PCR after exogenous TLR9 overexpression in Huh7 cells. (values are mean  $\pm$  SD, \*\*\* $p < 0.001$ ). (E) Correlation of TLR9 expression to PD-L1 expression by using the Signature Score Function at the GEPIA server. (F-K) MYC, JUN, IRF1, IRF3, STAT1 and STAT3 expression after silencing with siRNA in Huh7 cells. The MYC (F), JUN (G), IRF1 (H), IRF3 (I), STAT1 (J) and STAT3 (K) expression levels were analyzed by Western blotting. (L) p-STAT3 (Tyr705) levels after exogenous TLR9 overexpression in Huh7 cells. p-STAT3 levels were analyzed by immunofluorescence.

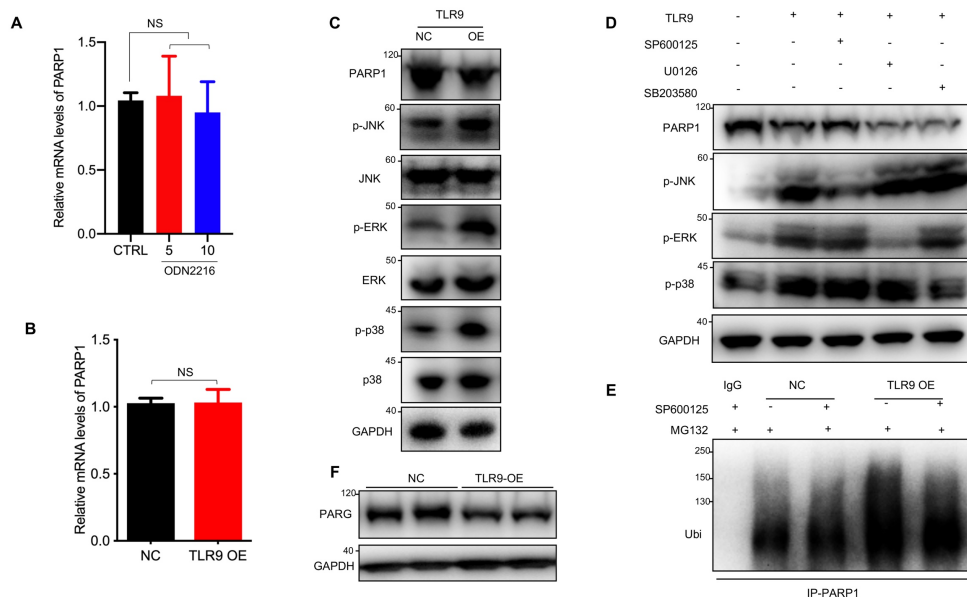

### Supplementary Figure. 3

(A) mRNA levels of PARP1 in Hep3B cells measured by qRT-PCR after exogenous TLR9 agonist stimulation. (values are mean  $\pm$  SD, NS indicates no significance). (B) mRNA levels of PARP1 in Huh7 cells measured by qRT-PCR after exogenous TLR9 overexpression. (values are mean  $\pm$  SD, NS indicates no significance). (C) PARP1 and MAPK levels after TLR9 overexpression. PARP1, p-JNK, p-ERK, and p-p38 levels were analyzed by Western blotting. (D) PARP1 levels after TLR9 overexpression alone or in the presence of the MAPK inhibitors SP600125, U0126, and SB203580. The PARP1, p-JNK, p-ERK, and p-p38 levels were analyzed by Western blotting. (E) Ubiquitination assay evaluating PARP1 after TLR9 overexpression alone or in the presence of the JNK inhibitor SP600125. Cell lysates were immunoprecipitated with an anti-PARP1 antibody and subjected to Western blot analysis with an antibody against ubiquitin. The cells were treated with MG132 prior to the ubiquitination analysis. (F) PARG levels after TLR9 overexpression. PARG levels were analyzed by Western blotting.

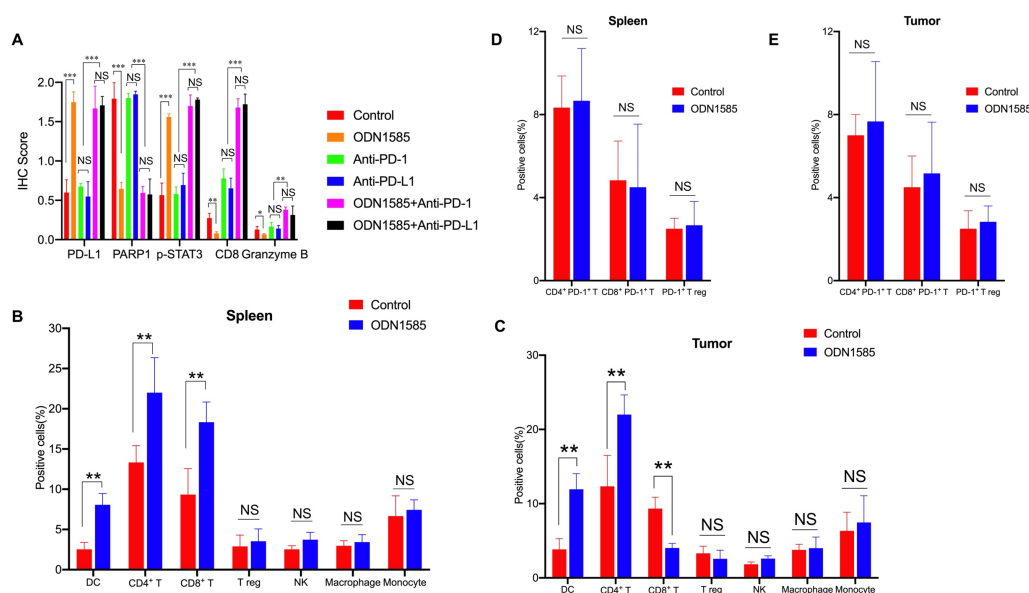

### Supplementary Figure. 4

(A) Histogram showing the immunohistochemistry score of PD-L1, PARP1, p-STAT3, CD8 and Granzyme B in Hepal-6 tumors following treatment with TLR9 agonist ODN1585 and/or anti-PD-1 antibody or anti-PD-L1 antibody. (values are mean  $\pm$  SD, \*P < 0.05, \*\*p < 0.01, \*\*\*p < 0.001, NS indicates no significance). (B and C) Immune cells, including T cells (CD4<sup>+</sup> and CD8<sup>+</sup>), T regulatory (Treg) cells (CD4<sup>+</sup>CD25<sup>+</sup>Foxp3<sup>+</sup>), natural killer (NK) cells (NK1.1<sup>+</sup>), macrophage cells (F4/80<sup>+</sup>CD11b<sup>+</sup>), monocyte cells (CD11b<sup>+</sup>) and dendritic cells (CD11c<sup>+</sup>CD317<sup>+</sup>) were detected by flow cytometry in mice spleen (B) and liver tumor tissues (C). (values are mean  $\pm$  SD, \*\*p < 0.01, NS indicates no significance). (D and E) PD-1<sup>+</sup> T cells, including CD4<sup>+</sup>PD-1<sup>+</sup>T cells, CD8<sup>+</sup>PD-1<sup>+</sup>T cells, CD4<sup>+</sup>CD25<sup>+</sup>Foxp3<sup>+</sup>PD-1<sup>+</sup>T cells were detected by flow cytometry after ODN1585 treatment in mice spleen (D) and liver tumor tissues (E). (values are mean  $\pm$  SD, NS indicates no significance).
